# Supplementary material for: Robust SARS-CoV-2-neutralizing antibodies sustained through 6 months post XBB.1.5 mRNA vaccine booster
Source: PubMed Central journal article supplement (PMC11524932; doi:10.1016/j.xcrm.2024.101701), 2024-08-28
Supplement: mmc1.pdf [file mmc1.pdf]

**Cell Reports Medicine, Volume 5**

**Supplemental information**

**Robust SARS-CoV-2-neutralizing  
antibodies sustained through 6 months  
post XBB.1.5 mRNA vaccine booster**

**Qian Wang, Ian A. Mellis, Yicheng Guo, Carmen Gherasim, Riccardo Valdez, Aubree Gordon, David D. Ho, and Lihong Liu**

| Clinical Information          | Across all        |            | XBB.1.5 MV        |            | XBB infx          |            | Prior Omicron infection + XBB.1.5 MV |            |                          |            |     |
|-------------------------------|-------------------|------------|-------------------|------------|-------------------|------------|--------------------------------------|------------|--------------------------|------------|-----|
|                               | Number<br>or mean | % or range | Number<br>or mean | % or range | Number<br>or mean | % or range | Pre-XBB infx +<br>XBB.1.5 MV         |            | XBB infx +<br>XBB.1.5 MV |            |     |
|                               |                   |            |                   |            |                   |            | Number<br>or mean                    | % or range | Number<br>or mean        | % or range |     |
| Total participants            | 39                |            | 10                |            | 9                 |            | 10                                   |            | 10                       |            |     |
| Male                          | 8                 | 20.5%      | 3                 | 30%        | 1                 | 11.10%     | 2                                    | 20%        | 2                        | 20%        |     |
| Female                        | 31                | 79.5%      | 7                 | 70%        | 8                 | 88.90%     | 8                                    | 80%        | 8                        | 80%        |     |
| Age                           | 51.6              | (30, 67)   | 52.6              | (38, 65)   | 52.1              | (40, 59)   | 49.7                                 | (36, 67)   | 52.1                     | (30, 62)   |     |
| First two WT doses            | Pfizer            | 35         | 89.7%             | 9          | 90%               | 8          | 88.90%                               | 9          | 90%                      | 9          | 90% |
|                               | Moderna           | 3          | 7.7%              | 1          | 10%               | 1          | 11.10%                               | 1          | 10%                      | 0          | 0%  |
|                               | Janssen           | 1          | 2.6%              | 0          | 0%                | 0          | 0%                                   | 0          | 0%                       | 1          | 10% |
| Third WT dose                 | Pfizer            | 34         | 87.2%             | 9          | 90%               | 8          | 88.90%                               | 9          | 90%                      | 8          | 80% |
|                               | Moderna           | 5          | 12.8%             | 1          | 10%               | 1          | 11.10%                               | 1          | 10%                      | 2          | 20% |
| Fourth WT dose                | Pfizer            | 13         | 33.3%             | 4          | 40%               | 3          | 33.30%                               | 2          | 20%                      | 4          | 40% |
|                               | Moderna           | 5          | 12.8%             | 3          | 30%               | 1          | 11.10%                               | 0          | 0%                       | 1          | 10% |
|                               | None              | 21         | 53.8%             | 3          | 30%               | 5          | 55.60%                               | 8          | 80%                      | 5          | 50% |
| BA.5 bivalent booster         | Pfizer            | 23         | 59%               | 6          | 60%               | 7          | 77.80%                               | 4          | 40%                      | 6          | 60% |
|                               | Moderna           | 16         | 41%               | 4          | 40%               | 2          | 22.20%                               | 6          | 60%                      | 4          | 40% |
| XBB MV booster                | Pfizer            | 13         | 33.3%             | 4          | 40%               | 0          | 0%                                   | 3          | 30%                      | 6          | 60% |
|                               | Moderna           | 17         | 43.6%             | 6          | 60%               | 0          | 0%                                   | 7          | 70%                      | 4          | 40% |
|                               | None              | 9          | 23.1%             | 0          | 0%                | 9          | 100%                                 | 0          | 0%                       | 0          | 0%  |
| First sample post-XBB (days)  | 26.4              | (21, 34)   | 26.2              | (22, 32)   | 27.8              | (24, 30)   | 26.9                                 | (21, 34)   | 24.7                     | (21, 30)   |     |
| Second sample post-XBB (days) | 82.1              | (68, 104)  | 82.1              | (70, 93)   | 92.1              | (78, 104)  | 77.6                                 | (68, 97)   | 77.5                     | (68, 92)   |     |

**Table S1. Summary of information on participants in this study who were exposed to XBB. Related to Figure 1.** Demographic, vaccine, and serum collection information summarized for each cohort. Listed values represent the mean and range (age and sera collection) or number and percentage (vaccine type and sex).

| Participa<br>nt ID                      | Age | Gender | Race     | Ethnicity              | Infectio<br>n Period | WT vaccines             |                         |                         |                         | Bivalent<br>vaccine | XBB.1.5<br>MV<br>vaccine | Days post-XBB             |                           | Days after 1 <sup>st</sup> WT vaccine dose |                            |                            |                     | XBB.1.5<br>MV<br>vaccine |
|-----------------------------------------|-----|--------|----------|------------------------|----------------------|-------------------------|-------------------------|-------------------------|-------------------------|---------------------|--------------------------|---------------------------|---------------------------|--------------------------------------------|----------------------------|----------------------------|---------------------|--------------------------|
|                                         |     |        |          |                        |                      | 1 <sup>st</sup><br>dose | 2 <sup>nd</sup><br>dose | 3 <sup>rd</sup><br>dose | 4 <sup>th</sup><br>dose |                     |                          | 1 <sup>st</sup><br>sample | 2 <sup>nd</sup><br>sample | 2 <sup>nd</sup> WT<br>dose                 | 3 <sup>rd</sup> WT<br>dose | 4 <sup>th</sup> WT<br>dose | Bivalent<br>vaccine |                          |
| <b>XBB.1.5 MV (n=12)</b>                |     |        |          |                        |                      |                         |                         |                         |                         |                     |                          |                           |                           |                                            |                            |                            |                     |                          |
| G4-1                                    | 62  | Female | White    | Not Hispanic or Latino | NA                   | Pfizer                  | Pfizer                  | Pfizer                  | Pfizer                  | Pfizer              | Moderna                  | 27                        | 93                        | 22                                         | 268                        | 491                        | 657                 | 993                      |
| G4-4                                    | 65  | Female | White    | Not Hispanic or Latino | NA                   | Pfizer                  | Pfizer                  | Pfizer                  | Pfizer                  | Pfizer              | Pfizer                   | 28                        | 79                        | 22                                         | 266                        | 503                        | 637                 | 990                      |
| G4-6                                    | 55  | Female | White    | Not Hispanic or Latino | NA                   | Pfizer                  | Pfizer                  | Pfizer                  | Moderna                 | Moderna             | Moderna                  | 25                        | 82                        | 21                                         | 272                        | 472                        | 637                 | 995                      |
| G4-8                                    | 38  | Male   | White    | Not Hispanic or Latino | NA                   | Moderna                 | Moderna                 | Moderna                 | NA                      | Moderna             | Pfizer                   | 27                        | 88                        | 28                                         | 235                        | NA                         | 539                 | 914                      |
| G4-9                                    | 64  | Female | White    | Not Hispanic or Latino | NA                   | Pfizer                  | Pfizer                  | Pfizer                  | Pfizer                  | Pfizer              | Pfizer                   | 32                        | 70                        | 21                                         | 270                        | 455                        | 606                 | 976                      |
| G4-12                                   | 40  | Male   | White    | Not Hispanic or Latino | NA                   | Pfizer                  | Pfizer                  | Pfizer                  | NA                      | Moderna             | Moderna                  | 22                        | 78                        | 21                                         | 268                        | NA                         | 584                 | 969                      |
| G4-14                                   | 50  | Male   | White    | Not Hispanic or Latino | NA                   | Pfizer                  | Pfizer                  | Pfizer                  | Moderna                 | Pfizer              | Moderna                  | 31                        | 88                        | 21                                         | 235                        | 444                        | 621                 | 996                      |
| G4-15                                   | 54  | Female | White    | Not Hispanic or Latino | NA                   | Pfizer                  | Pfizer                  | Pfizer                  | Moderna                 | Pfizer              | Moderna                  | 22                        | 89                        | 21                                         | 329                        | 490                        | 623                 | 990                      |
| G4-17                                   | 56  | Female | White    | Not Hispanic or Latino | NA                   | Pfizer                  | Pfizer                  | Pfizer                  | Pfizer                  | Pfizer              | Moderna                  | 22                        | 71                        | 21                                         | 287                        | 507                        | 654                 | 1016                     |
| G4-19                                   | 42  | Female | White    | Not Hispanic or Latino | NA                   | Pfizer                  | Pfizer                  | Pfizer                  | NA                      | Moderna             | Pfizer                   | 26                        | 83                        | 21                                         | 239                        | NA                         | 520                 | 910                      |
| <b>XBB infx (n=9)</b>                   |     |        |          |                        |                      |                         |                         |                         |                         |                     |                          |                           |                           |                                            |                            |                            |                     |                          |
| G3-4                                    | 59  | Female | White    | Not Hispanic or Latino | 2023.08              | Pfizer                  | Pfizer                  | Pfizer                  | Pfizer                  | Pfizer              | NA                       | 26                        | 78                        | 21                                         | 295                        | 472                        | 660                 | NA                       |
| G3-6                                    | 54  | Female | White    | Not Hispanic or Latino | 2023.09              | Pfizer                  | Pfizer                  | Pfizer                  | Pfizer                  | Pfizer              | NA                       | 28                        | 100                       | 21                                         | 222                        | 421                        | 602                 | NA                       |
| G3-9                                    | 59  | Female | White    | Not Hispanic or Latino | 2023.05              | Pfizer                  | Pfizer                  | Pfizer                  | Pfizer                  | Pfizer              | NA                       | 30                        | 86                        | 25                                         | 281                        | 469                        | 613                 | NA                       |
| G3-12                                   | 42  | Male   | White    | Not Hispanic or Latino | 2023.04              | Pfizer                  | Pfizer                  | Pfizer                  | NA                      | Moderna             | NA                       | 28                        | 88                        | 21                                         | 269                        | NA                         | 615                 | NA                       |
| G3-15                                   | 53  | Female | White    | Not Hispanic or Latino | 2023.02              | Pfizer                  | Pfizer                  | Pfizer                  | NA                      | Pfizer              | NA                       | 27                        | 97                        | 22                                         | 320                        | NA                         | 645                 | NA                       |
| G3-16                                   | 40  | Female | White    | Not Hispanic or Latino | 2023.05              | Pfizer                  | Pfizer                  | Pfizer                  | NA                      | Pfizer              | NA                       | 28                        | 90                        | 21                                         | 279                        | NA                         | 658                 | NA                       |
| G3-17                                   | 49  | Female | White    | Not Hispanic or Latino | 2023.07              | Pfizer                  | Pfizer                  | Pfizer                  | NA                      | Moderna             | NA                       | 30                        | 95                        | 22                                         | 328                        | NA                         | 641                 | NA                       |
| G3-18                                   | 59  | Female | White    | Not Hispanic or Latino | 2023.04              | Moderna                 | Moderna                 | Moderna                 | Moderna                 | Pfizer              | NA                       | 24                        | 91                        | 28                                         | 268                        | 505                        | 584                 | NA                       |
| G3-20                                   | 54  | Female | White    | Not Hispanic or Latino | 2023.08              | Pfizer                  | Pfizer                  | Pfizer                  | NA                      | Pfizer              | NA                       | 29                        | 104                       | 23                                         | 284                        | NA                         | 632                 | NA                       |
| <b>Pre-XBB infx + XBB.1.5 MV (n=10)</b> |     |        |          |                        |                      |                         |                         |                         |                         |                     |                          |                           |                           |                                            |                            |                            |                     |                          |
| G5-1                                    | 41  | Female | Declined | Not Hispanic or Latino | 2022.09              | Moderna                 | Moderna                 | Moderna                 | NA                      | Pfizer              | Moderna                  | 25                        | 68                        | 28                                         | 330                        | NA                         | 715                 | 1009                     |
| G5-2                                    | 61  | Female | White    | Not Hispanic or Latino | 2022.04              | Pfizer                  | Pfizer                  | Pfizer                  | NA                      | Moderna             | Moderna                  | 34                        | 76                        | 22                                         | 302                        | NA                         | 649                 | 1006                     |
| G5-3                                    | 53  | Female | White    | Not Hispanic or Latino | 2022.04              | Pfizer                  | Pfizer                  | Pfizer                  | NA                      | Pfizer              | Moderna                  | 25                        | 81                        | 21                                         | 275                        | NA                         | 626                 | 999                      |
| G5-4                                    | 49  | Male   | White    | Not Hispanic or Latino | 2022.01              | Pfizer                  | Pfizer                  | Pfizer                  | NA                      | Pfizer              | Pfizer                   | 22                        | 77                        | 21                                         | 265                        | NA                         | 691                 | 956                      |
| G5-5                                    | 67  | Female | White    | Not Hispanic or Latino | 2022.07              | Pfizer                  | Pfizer                  | Pfizer                  | Pfizer                  | Moderna             | Moderna                  | 29                        | 73                        | 21                                         | 271                        | 473                        | 690                 | 992                      |
| G5-7                                    | 48  | Female | White    | Not Hispanic or Latino | 2022.01              | Pfizer                  | Pfizer                  | Pfizer                  | NA                      | Moderna             | Pfizer                   | 22                        | 75                        | 21                                         | 254                        | NA                         | 554                 | 925                      |
| G5-10                                   | 40  | Female | Multiple | Not Hispanic or Latino | 2022.04              | Pfizer                  | Pfizer                  | Pfizer                  | NA                      | Moderna             | Moderna                  | 21                        | 70                        | 24                                         | 276                        | NA                         | 638                 | 1003                     |
| G5-12                                   | 43  | Female | White    | Not Hispanic or Latino | 2022.01              | Pfizer                  | Pfizer                  | Pfizer                  | NA                      | Moderna             | Pfizer                   | 32                        | 72                        | 21                                         | 234                        | NA                         | 566                 | 913                      |
| G5-13                                   | 36  | Male   | White    | Not Hispanic or Latino | 2022.08              | Pfizer                  | Pfizer                  | Pfizer                  | NA                      | Moderna             | Moderna                  | 30                        | 97                        | 21                                         | 316                        | NA                         | 655                 | 980                      |
| G5-14                                   | 59  | Female | White    | Not Hispanic or Latino | 2022.04              | Pfizer                  | Pfizer                  | Pfizer                  | Pfizer                  | Pfizer              | Moderna                  | 29                        | 87                        | 21                                         | 277                        | 543                        | 610                 | 986                      |
| <b>XBB infx + XBB.1.5 MV (n=10)</b>     |     |        |          |                        |                      |                         |                         |                         |                         |                     |                          |                           |                           |                                            |                            |                            |                     |                          |
| G6-1                                    | 54  | Female | White    | Not Hispanic or Latino | 2023.02              | Pfizer                  | Pfizer                  | Pfizer                  | Moderna                 | Pfizer              | Moderna                  | 22                        | 70                        | 21                                         | 262                        | 492                        | 632                 | 1003                     |
| G6-2                                    | 58  | Female | White    | Not Hispanic or Latino | 2023.02              | Pfizer                  | Pfizer                  | Pfizer                  | NA                      | Pfizer              | Pfizer                   | 22                        | 74                        | 21                                         | 284                        | NA                         | 682                 | 1000                     |
| G6-3                                    | 61  | Male   | White    | Not Hispanic or Latino | 2023.05              | Pfizer                  | Pfizer                  | Moderna                 | NA                      | Moderna             | Moderna                  | 30                        | 87                        | 21                                         | 231                        | NA                         | 541                 | 917                      |
| G6-4                                    | 42  | Female | White    | Not Hispanic or Latino | 2023.03              | Pfizer                  | Pfizer                  | Pfizer                  | Pfizer                  | Moderna             | Pfizer                   | 29                        | 83                        | 21                                         | 266                        | 477                        | 608                 | 996                      |
| G6-5                                    | 62  | Female | White    | Not Hispanic or Latino | 2023.06              | Pfizer                  | Pfizer                  | Pfizer                  | Pfizer                  | Pfizer              | Pfizer                   | 21                        | 73                        | 21                                         | 277                        | 439                        | 643                 | 1002                     |
| G6-6                                    | 46  | Male   | White    | Not Hispanic or Latino | 2023.05              | Janssen                 | Janssen                 | Moderna                 | NA                      | Pfizer              | Pfizer                   | 24                        | 71                        | 214                                        | 386                        | NA                         | 543                 | 921                      |
| G6-7                                    | 61  | Female | White    | Not Hispanic or Latino | 2023.04              | Pfizer                  | Pfizer                  | Pfizer                  | Pfizer                  | Moderna             | Moderna                  | 26                        | 76                        | 21                                         | 275                        | 519                        | 625                 | 1004                     |
| G6-8                                    | 62  | Female | Asian    | Not Hispanic or Latino | 2023.04              | Pfizer                  | Pfizer                  | Pfizer                  | Pfizer                  | Pfizer              | Moderna                  | 29                        | 81                        | 21                                         | 294                        | 516                        | 630                 | 1000                     |
| G6-9                                    | 30  | Female | White    | Hispanic or Latino     | 2023.08              | Pfizer                  | Pfizer                  | Pfizer                  | NA                      | Moderna             | Pfizer                   | 22                        | 68                        | 21                                         | 218                        | NA                         | 580                 | 922                      |
| G6-11                                   | 45  | Female | White    | Not Hispanic or Latino | 2023.08              | Pfizer                  | Pfizer                  | Pfizer                  | NA                      | Pfizer              | Pfizer                   | 22                        | 92                        | 21                                         | 269                        | NA                         | 624                 | 984                      |

**Table S2. Details of participants exposed to XBB. Related to Figure 1.** Clinical information for each participant, including demographic, vaccine, infection, and sera details.

| Participant ID           | Age         | Gender | Race  | Ethnicity              | Infection Period | Days post-vaccination  |                        |                        |
|--------------------------|-------------|--------|-------|------------------------|------------------|------------------------|------------------------|------------------------|
|                          |             |        |       |                        |                  | 1 <sup>st</sup> sample | 2 <sup>nd</sup> sample | 3 <sup>rd</sup> sample |
| <b>BA.5 BV (n=8)</b>     |             |        |       |                        |                  |                        |                        |                        |
| BA.5-1                   | 24          | Female | White | Not Hispanic or Latino | NA               | 30                     | 85                     | 162                    |
| BA.5-2                   | 43          | Female | White | Not Hispanic or Latino | NA               | 26                     | 91                     | 205                    |
| BA.5-3                   | 45          | Male   | White | Not Hispanic or Latino | NA               | 26                     | 98                     | 204                    |
| BA.5-4                   | 36          | Female | White | Not Hispanic or Latino | NA               | 27                     | 90                     | 173                    |
| BA.5-5                   | 38          | Female | White | Not Hispanic or Latino | NA               | 24                     | 90                     | 198                    |
| BA.5-6                   | 36          | Male   | White | Not Hispanic or Latino | NA               | 24                     | 95                     | 161                    |
| BA.5-7                   | 42          | Female | White | Not Hispanic or Latino | NA               | 27                     | 97                     | 177                    |
| BA.5-8                   | 32          | Female | White | Not Hispanic or Latino | NA               | 29                     | 97                     | 163                    |
| <b>Average</b>           | <b>37.0</b> | -      | -     | -                      | -                | <b>26.6</b>            | <b>92.9</b>            | <b>180.4</b>           |
| <b>XBB.1.5 MV (n=14)</b> |             |        |       |                        |                  |                        |                        |                        |
| XBB.1.5-1                | 55          | Female | White | Not Hispanic or Latino | NA               | 25                     | 82                     | 165                    |
| XBB.1.5-2                | 38          | Male   | White | Not Hispanic or Latino | NA               | 27                     | 88                     | 171                    |
| XBB.1.5-4                | 36          | Male   | White | Not Hispanic or Latino | NA               | 26                     | 94                     | 164                    |
| XBB.1.5-5                | 58          | Female | Black | Not Hispanic or Latino | NA               | 21                     | 63                     | 136                    |
| XBB.1.5-6                | 60          | Female | White | Not Hispanic or Latino | NA               | 25                     | 82                     | 223                    |
| XBB.1.5-7                | 53          | Female | White | Not Hispanic or Latino | NA               | 23                     | 70                     | 139                    |
| XBB.1.5-8                | 27          | Female | White | Not Hispanic or Latino | NA               | 32                     | 76                     | 153                    |
| XBB.1.5-9                | 50          | Male   | White | Not Hispanic or Latino | NA               | 32                     | 88                     | 190                    |
| XBB.1.5-10               | 60          | Female | White | Not Hispanic or Latino | NA               | 28                     | 80                     | 178                    |
| XBB.1.5-11               | 42          | Female | White | Not Hispanic or Latino | NA               | 23                     | 74                     | 153                    |
| XBB.1.5-12               | 58          | Female | White | Not Hispanic or Latino | NA               | 21                     | 71                     | 155                    |
| XBB.1.5-13               | 31          | Female | White | Not Hispanic or Latino | NA               | 28                     | 92                     | 167                    |
| XBB.1.5-14               | 68          | Male   | White | Not Hispanic or Latino | NA               | 27                     | 85                     | 176                    |
| XBB.1.5-15               | 47          | Male   | Asian | Not Hispanic or Latino | NA               | 22                     | 72                     | 158                    |
| <b>Average</b>           | <b>48.8</b> | -      | -     | -                      | -                | <b>25.7</b>            | <b>79.8</b>            | <b>166.3</b>           |

**Table S3. Details of participants exposed to the BA.5 bivalent mRNA vaccine or the XBB.1.5 MV vaccine booster. Related to Figure 2.** Clinical information for each participant, including demographics and sample collection timepoints.
